# Supplementary material
Source: publisher figshare collection journal article supplement (https://springernature.figshare.com/ndownloader/files/30833269)
Supplement: Supplementary file 1 [file 30833269]

Measurement(s),travel-related behavior • travel-related attitude
Technology Type(s),Survey
Factor Type(s),temporal interval
Sample Characteristic - Organism,Homo sapiens
Sample Characteristic - Location,United States of America
